# Supplementary material for: Zoledronic Acid-Loaded Hybrid Hyaluronic Acid/Polyethylene Glycol/Nano-Hydroxyapatite Nanoparticle: Novel Fabrication and Safety Verification
Source: Front Bioeng Biotechnol. 2021 Feb 15;9:629928. doi: 10.3389/fbioe.2021.629928 (PMC7917242; doi:10.3389/fbioe.2021.629928)
Supplement: Supplementary Table 1 — CCK-8 raw data. [file Table_1.XLSX]

## Sheet: Result sheet
Method name: CCK8-ZZ
Application: SparkControl				V3.0
Device: Spark				Serial number: 1911004144
Firmware:				LUM:V5.2.4|ABS:V4.3.2|ABS_MEX:V5.1.1|MTP:V14.2.11|FLUOR:V5.1.4|FLUOR_FP:V5.0.2|FLUOR_BOTTOM:V5.0.2|FLUOR_MEM:V5.1.1|FLUOR_MEX:V5.1.1|GCM:V3.0.2|INJ:V3.1.1|PODI:V1.11.2
Date:				2020-10-24
Time:				8:39
System				DESKTOP-06ADSQN
User				DESKTOP-06ADSQN\dl
Plate				[GRE96ft] - Greiner 96 Flat Transparent Cat. No.: 655101/655161/655192
Lid lifter				No lid
Humidity Cassette				No humidity cassette
Smooth mode				Not selected
List of actions in this measurement script:
Plate
	Shaking
	Absorbance					Label 1
Name				GRE96ft
Plate layout
Plate area				A1-H12
Start Time				2020-10-24 08:38:29
Shaking (Linear) Duration [s]				30
Shaking (Linear) Position				Current
Shaking (Linear) Amplitude [mm]				1
Shaking (Linear) Frequency [rpm]				1440
End Time				2020-10-24 08:38:59
Mode	Absorbance
Name	Label 1
Measurement wavelength [nm]				450
Number of flashes				10
Settle time [ms]				50
Part of Plate				A1-H12
Start Time				2020-10-24 08:38:59
Temperature [°C]				23.3
<>	1	2	3	4	5	6	7	8	9	10	11	12
A	0.9128	0.7579	0.6898	0.7049	0.6553	0.7518	0.7724	0.7591	0.8024	0.7817	0.759	0.166
B	0.8258	0.7418	0.7288	0.6856	0.6931	0.7274	0.7387	0.7562	0.7259	0.7596	0.798	0.1502
C	0.786	0.7493	0.7968	0.6386	0.6234	0.691	0.6903	0.7295	0.7317	0.756	0.8062	0.1558
D	0.746	0.7656	0.6905	0.662	0.6699	0.7068	0.6992	0.7417	0.7386	0.7759	0.7973	0.1594
E	0.7922	0.7718	0.6677	0.6361	0.6844	0.7055	0.6074	0.5294	0.5509	0.439	0.0624	0.0598
F	0.7805	0.6994	0.6511	0.6858	0.7024	0.735	0.635	0.5248	0.5454	0.242	0.0596	0.0576
G	0.7957	0.7577	0.6836	0.6602	0.7126	0.7193	0.5915	0.5467	0.5387	0.4898	0.0593	0.0706
H	0.8387	0.7165	0.6256	0.6739	0.6463	0.6432	0.5653	0.575	0.5759	0.2163	0.0585	0.0598
End Time				2020-10-24 08:39:22
