# Supplementary material for: Zoledronic Acid-Loaded Hybrid Hyaluronic Acid/Polyethylene Glycol/Nano-Hydroxyapatite Nanoparticle: Novel Fabrication and Safety Verification
Source: Front Bioeng Biotechnol. 2021 Feb 15;9:629928. doi: 10.3389/fbioe.2021.629928 (PMC7917242; doi:10.3389/fbioe.2021.629928)
Supplement: Supplementary Table 2 — Biochemical indexes raw data. [file Table_2.XLSX]

## Sheet: Sheet1
Biochemical Report of Wuhan Xavier Biotech Co., Ltd
Name: Wu Hongwei	Sample number:	18
Measure:ALT,AST，ALP，BUN，CR	Sample category:	serum
Sample treatment
I. Blood samples: 3000-4000r, 10min, clear, put 4 degrees C refrigerator, to be tested.
II. Cells: Collect and clear, put 4 degrees C refrigerator, to be tested.
III. Organization: called the appropriate amount of tissue, ground with 9 times physiological saline, and then the grinding fluid 3000-4000r, centrifugal 10min, clear,
put a refrigerator at 4 degrees C, to be tested.
Instrument information
Centrifuge	TGL-16C
Fully automatic grinder	Wuhan Xavier Bio (KH-III)
Fully automatic grinder	AJC-0501-P
Micro vortex mixer	WH-2
Water bath pot	TL-420D
10μl pipette	DS74948
1000μl pipette	DS93879
100μl pipette	DX15487
refrigerator	BCD-186
Fully automatic biochemic analyzer Chemray 240	Shenzhen Raydo Life Technology
Kit information
Name	Catlog	batch	manufactures
Alanine amino transferase ALT assay kit	C052	2019002	Changchun Huili
AST assay kit	C072	2019003	Changchun Huili
Alkaline phosphatase determination kit	C003	2019001	Changchun Huili
Urea nitrogen determination kit	C010	2019001	Changchun Huili
Creatinine assay kit	C074	2019001	Changchun Huili

## Sheet: Sheet2
D2
	PBS			250			500			1000
ALT	44.172	45.808	32.72	46.3664	44.3111	46.855	50.4871	42.7691	54.662	77.0015	83.2912	67.172
AST	139.2	141.984	136.416	222.84	145.636	173.773	282.256	185.379	252.991	430.723	358.085	364.907
ALP	62.4912	72.4632	63.156	73.7445	66.5783	82.6531	78.8188	82.8558	69.3865	118.203	121.944	129.46
BUN	30.6702	32.529	29.7408	28.083	31.7505	25.8462	24.726	33.559	32.2764	27.816	28.8977	41.5408
CR	31.3017	30.9978	28.8705	25.5522	28.4078	31.2652	38.1023	40.2205	37.7823	46.5687	52.7169	49.9365
D3
	PBS			250			500			1000
ALT	43.888	43.044	39.668	42.4665	43.6757	51.9849	23.6346	47.1536	42.7608	74.8996	77.7483	42.727
AST	150.183	117.711	138.006	177.643	166.804	139.939	126.756	160.098	135.183	267.11	287.943	299.401
ALP	76.241	70.6962	60.9928	48.509	99.6941	70.2449	50.1985	71.5958	85.4107	59.8906	85.8903	91.7581
BUN	25.7833	30.9979	30.1288	26.9888	38.4866	51.6337	55.8726	37.4796	27.0804	63.0672	65.1462	58.3018
CR	27.5632	26.6644	35.6524	60.2786	52.2472	48.6766	78.8261	82.307	87.1908	87.7424	87.8478	84.8428
D5
	PBS			250			500			1000
ALT	44.688	47.88	44.232	48.4101	46.6844	37.0454	67.9772	77.6218	58.5649	38.6757	205.106	105.692
AST	161.23	143.004	116.366	290.67	143.425	140.557	440.049	242.846	255.37	309.963	729.024	669.476
ALP	77.016	64.8218	50.7022	64.1473	66.4086	82.4282	37.1824	85.6667	91.1555	41.3073	93.1783	110.477
BUN	23.2232	25.0705	30.8763	28.642	30.0181	26.7779	21.2897	30.0986	29.8571	23.4789	130.64	108.946
CR	31.9908	32.2926	26.2566	19.9941	50.1362	42.6253	60.0258	67.497	73.6069	47.554	142.417	66.936
